# Supplementary material for: Consequences of Lineage-Specific Gene Loss on Functional Evolution of Surviving Paralogs: ALDH1A and Retinoic Acid Signaling in Vertebrate Genomes
Source: PLOS journal article supplement (doi:10.1371/journal.pgen.1000496), 2009-05-28
Supplement: S4 (10.1371/journal.pgen.1000496.s004) [file journal.pgen.1000496.s004]

| Genomic distribution of the Mouse orthologs of the Human 10-Mb GN surrounding the human ALDH1A1. |                  |              |                  |                  |                    |              |                 |                 |
|--------------------------------------------------------------------------------------------------|------------------|--------------|------------------|------------------|--------------------|--------------|-----------------|-----------------|
| Genomic region analyzed: human chromosome 9 (69.000 KB - 79.000 KB)                              |                  |              |                  |                  |                    |              |                 |                 |
| Group ID                                                                                         | Query Gene ID    | Query Ext ID | Query Chromosome | Query Start Base | Outq Gene ID       | Outq Ext ID  | Outq Chromosome | Outq Start Base |
| 11796                                                                                            | ENSG00000072062  | PRKACA       | Hsa19            | 14063509         | ENSMUSG00000005469 | Prkaca       | Mmu8            | 86863093        |
| 11796                                                                                            | ENSG00000165059  | PRKACG       | Hsa9             | 70817241         | ENSMUSG00000005469 | Prkaca       | Mmu8            | 86863093        |
| 14275                                                                                            | ENSG00000156017  | C9orf41      | Hsa9             | 76785754         | ENSMUSG00000024726 | 2410127L17Ri | Mmu19           | 18737845        |
| 14279                                                                                            | ENSG00000107362  | C9orf77      | Hsa9             | 73667188         | ENSMUSG00000047368 | 5730446C15Ri | Mmu19           | 21720406        |
| 14341                                                                                            | ENSG00000106733  | C9orf95      | Hsa9             | 76865309         | ENSMUSG00000037847 | BC016495     | Mmu19           | 18703133        |
| 14347                                                                                            | ENSG00000135063  | C9orf61      | Hsa9             | 71130168         | ENSMUSG00000071604 | Gm967        | Mmu19           | 24040525        |
| 14369                                                                                            | ENSG00000187210  | GCNT1        | Hsa9             | 78263966         | ENSMUSG00000038843 | Gcnt1        | Mmu19           | 17393162        |
| 14370                                                                                            | ENSG00000165092  | ALDH1A1      | Hsa9             | 74705408         | ENSMUSG00000053279 | Aldh1a1      | Mmu19           | 20669078        |
| 14375                                                                                            | ENSG00000198963  | RORB         | Hsa9             | 76302072         | ENSMUSG00000036192 | Rorb         | Mmu19           | 19004903        |
| 14376                                                                                            | ENSG00000135045  | C9orf40      | Hsa9             | 76751317         | ENSMUSG00000047044 | D030056L22Ri | Mmu19           | 18780255        |
| 14378                                                                                            | ENSG00000083067  | TRPM3        | Hsa9             | 72339769         | ENSMUSG00000052387 | Trpm3        | Mmu19           | 22206216        |
| 14379                                                                                            | ENSG00000107282  | APBA1        | Hsa9             | 71235022         | ENSMUSG00000024897 | Apba1        | Mmu19           | 23825973        |
| 14381                                                                                            | ENSG00000119125  | GDA          | Hsa9             | 73954113         | ENSMUSG00000058624 | Gda          | Mmu19           | 21370247        |
| 14382                                                                                            | ENSG000000099139 | PCSK5        | Hsa9             | 77695406         | ENSMUSG00000024713 | Pcsk5        | Mmu19           | 17500412        |
| 14387                                                                                            | ENSG00000107372  | ZFAND5       | Hsa9             | 74159194         | ENSMUSG00000024750 | Za20d2       | Mmu19           | 21339375        |
| 14393                                                                                            | ENSG00000198887  | SMC5         | Hsa9             | 72063757         | ENSMUSG00000024943 | Smc5l1       | Mmu19           | 23275820        |
| 14397                                                                                            | ENSG00000165091  | TMC1         | Hsa9             | 74326537         | ENSMUSG00000024749 | Tmc1         | Mmu19           | 20852006        |
| 14405                                                                                            | ENSG00000188647  | PTAR1        | Hsa9             | 71514261         | ENSMUSG00000074925 |              | Mmu19           | 23754554        |
| 14450                                                                                            | ENSG00000135002  | RFK          | Hsa9             | 78190253         | ENSMUSG00000024712 | Rfk          | Mmu19           | 17461102        |
| 14457                                                                                            | ENSG00000119139  | TJP2         | Hsa9             | 70956382         | ENSMUSG00000024812 | Tip2         | Mmu19           | 24161608        |
| 14533                                                                                            | ENSG00000135046  | ANXA1        | Hsa9             | 74956493         | ENSMUSG00000024659 | Anxa1        | Mmu19           | 20440453        |
| 14547                                                                                            | ENSG00000135048  | TMEM2        | Hsa9             | 73488102         | ENSMUSG00000024754 | Tmem2        | Mmu19           | 21845439        |
| 14556                                                                                            | ENSG00000165060  | FXN          | Hsa9             | 70839995         | ENSMUSG00000059363 | Fxn          | Mmu19           | 24328550        |
| 14563                                                                                            | ENSG00000187866  | FAM122A      | Hsa9             | 70584784         | ENSMUSG00000074922 | 2900009I07Ri | Mmu19           | 24543599        |
| 14563                                                                                            | ENSG00000156500  | FAM122C      | HsaX             | 133768885        | ENSMUSG00000074922 | 2900009I07Ri | Mmu19           | 24543599        |
| 14580                                                                                            | ENSG00000147996  | CBWD1        | Hsa9             | 111039           | ENSMUSG00000024878 | Cbwd1        | Mmu19           | 24987487        |
| 14580                                                                                            | ENSG00000136682  | CBWD2        | Hsa2             | 113911853        | ENSMUSG00000024878 | Cbwd1        | Mmu19           | 24987487        |
| 14580                                                                                            | ENSG00000172785  | CBWD5        | Hsa9             | 69671821         | ENSMUSG00000024878 | Cbwd1        | Mmu19           | 24987487        |
| 14580                                                                                            | ENSG00000196873  | CBWD6        | Hsa9             | 70046217         | ENSMUSG00000024878 | Cbwd1        | Mmu19           | 24987487        |
| 14580                                                                                            | ENSG00000204790  | Q4V339 HUMAN | Hsa9             | 68494355         | ENSMUSG00000024878 | Cbwd1        | Mmu19           | 24987487        |
| 14610                                                                                            | ENSG00000107242  | PIP5K1B      | Hsa9             | 70510436         | ENSMUSG00000024867 | Pip5k1a      | Mmu19           | 24371129        |
| 14635                                                                                            | ENSG00000204711  | C9orf135     | Hsa9             | 71625529         | ENSMUSG00000033053 | 1700028P14Ri | Mmu19           | 23625857        |
| 14647                                                                                            | ENSG00000154330  | PGM5         | Hsa9             | 70161635         | ENSMUSG00000041731 | Pgm5         | Mmu19           | 24745358        |
| 14647                                                                                            | ENSG00000204794  | Q5VTQ8 HUMAN | Hsa9             | 68155593         | ENSMUSG00000041731 | Pgm5         | Mmu19           | 24745358        |
| 14656                                                                                            | ENSG00000134996  | OSTF1        | Hsa9             | 76893210         | ENSMUSG00000024725 | Ostf1        | Mmu19           | 18648289        |
| 14664                                                                                            | ENSG00000170122  | FOXD4L1      | Hsa2             | 113972712        | ENSMUSG00000051490 | Foxd4        | Mmu19           | 24966597        |
| 14664                                                                                            | ENSG00000187559  | FOXD4L3      | Hsa9             | 70107603         | ENSMUSG00000051490 | Foxd4        | Mmu19           | 24966597        |
| 14664                                                                                            | ENSG00000204793  | Q4V336 HUMAN | Hsa9             | 68489300         | ENSMUSG00000051490 | Foxd4        | Mmu19           | 24966597        |
| 14664                                                                                            | ENSG00000204779  | XR_016691.1  | Hsa9             | 69465527         | ENSMUSG00000051490 | Foxd4        | Mmu19           | 24966597        |
| 14664                                                                                            | ENSG00000184659  | FOXDL4       | Hsa9             | 69666443         | ENSMUSG00000051490 | Foxd4        | Mmu19           | 24966597        |
| 14664                                                                                            | ENSG00000204828  | FXDL4 HUMAN  | Hsa9             | 42707230         | ENSMUSG00000051490 | Foxd4        | Mmu19           | 24966597        |
| 14664                                                                                            | ENSG00000184492  | FOXDL4       | Hsa9             | 105991           | ENSMUSG00000051490 | Foxd4        | Mmu19           | 24966597        |
| 14673                                                                                            | ENSG00000204612  | FOXB2        | Hsa9             | 78824391         | ENSMUSG00000056829 | Foxb2        | Mmu19           | 16939373        |
| 14704                                                                                            | ENSG00000197969  | VPS13A       | Hsa9             | 78982181         | ENSMUSG00000046230 | Vps13a       | Mmu19           | 16683690        |
| 14715                                                                                            | ENSG00000155621  | C9orf85      | Hsa9             | 73716243         | ENSMUSG00000035171 | 1110059E24Ri | Mmu19           | 21664410        |
| 14735                                                                                            | ENSG00000119121  | TRPM6        | Hsa9             | 76527231         | ENSMUSG00000024727 | Trpm6        | Mmu19           | 18817002        |
| 14740                                                                                            | ENSG00000165072  | MAMDC2       | Hsa9             | 71848317         | ENSMUSG00000033207 | Mamdc2       | Mmu19           | 23369706        |
| 14750                                                                                            | ENSG00000119138  | KLF9         | Hsa9             | 72189323         | ENSMUSG00000033863 | Klf9         | Mmu19           | 23208323        |
| 14795                                                                                            | ENSG00000181778  | C9orf71      | Hsa9             | 70341316         | ENSMUSG00000048572 | E030010A14Ri | Mmu19           | 24741102        |
| 15046                                                                                            | ENSG00000160916  | ATP5J2       | Hsa7             | 98893721         | ENSMUSG00000038690 | Atp5j2       | Mmu5            | 145437366       |
| 15046                                                                                            | ENSG00000171995  | 653324       | Hsa12            | 6249586          | ENSMUSG00000038690 | Atp5j2       | Mmu5            | 145437366       |
| 15046                                                                                            | ENSG00000198475  |              | Hsa17            | 59918102         | ENSMUSG00000038690 | Atp5j2       | Mmu5            | 145437366       |
| 15046                                                                                            | ENSG00000185796  |              | Hsa6             | 109335505        | ENSMUSG00000038690 | Atp5j2       | Mmu5            | 145437366       |
| 15046                                                                                            | ENSG00000186390  | 645225       | Hsa9             | 78845137         | ENSMUSG00000038690 | Atp5j2       | Mmu5            | 145437366       |

| Genomic distribution of the Mouse orthologs of the Human 10-Mb GN surrounding the human ALDH1A2. |                 |              |                  |                  |                     |              |                 |                 |
|--------------------------------------------------------------------------------------------------|-----------------|--------------|------------------|------------------|---------------------|--------------|-----------------|-----------------|
| Genomic region analyzed: human chromosome 15 (51.000 KB - 61.000 KB)                             |                 |              |                  |                  |                     |              |                 |                 |
| Group ID                                                                                         | Query Gene ID   | Query Ext ID | Query Chromosome | Query Start Base | Outq Gene ID        | Outq Ext ID  | Outq Chromosome | Outq Start Base |
| 1760                                                                                             | ENSG00000134333 | LDHA         | Hsa11            | 18372683         | ENSMUSG000000063229 | Ldha         | Mmu7            | 46713883        |
| 1760                                                                                             | ENSG00000166800 | LDHAL6A      | Hsa11            | 18434007         | ENSMUSG000000063229 | Ldha         | Mmu7            | 46713883        |
| 1760                                                                                             | ENSG00000171989 | LDHAL6B      | Hsa15            | 57286314         | ENSMUSG000000063229 | Ldha         | Mmu7            | 46713883        |
| 1760                                                                                             | ENSG00000178001 |              | Hsa12            | 61683600         | ENSMUSG000000063229 | Ldha         | Mmu7            | 46713883        |
| 3733                                                                                             | ENSG00000176244 | ACBD7        | Hsa10            | 15157481         | ENSMUSG00000026644  | 9230116B18Ri | Mmu2            | 3257539         |
| 3733                                                                                             | ENSG00000140238 | 650875       | Hsa15            | 54925830         | ENSMUSG00000026644  | 9230116B18Ri | Mmu2            | 3257539         |
| 5567                                                                                             | ENSG00000137876 | C15orf15     | Hsa15            | 53260813         | ENSMUSG00000053740  | BC003885     | Mmu18           | 14713131        |
| 5567                                                                                             | ENSG00000141650 | 284288       | Hsa18            | 53656706         | ENSMUSG00000053740  | BC003885     | Mmu18           | 14713131        |
| 6834                                                                                             | ENSG00000205581 | HMGNI        | Hsa21            | 39636111         | ENSMUSG00000040681  | Hmgn1        | Mmu16           | 96225528        |
| 6834                                                                                             | ENSG00000198875 | 731104       | Hsa2             | 97810143         | ENSMUSG00000040681  | Hmgn1        | Mmu16           | 96225528        |
| 6834                                                                                             | ENSG00000157576 | XR_018454.1  | Hsa15            | 91055981         | ENSMUSG00000040681  | Hmgn1        | Mmu16           | 96225528        |
| 6834                                                                                             | ENSG00000174558 | 728325       | Hsa11            | 3966963          | ENSMUSG00000040681  | Hmgn1        | Mmu16           | 96225528        |
| 6834                                                                                             | ENSG00000184409 | 728776       | HsaX             | 153698568        | ENSMUSG00000040681  | Hmgn1        | Mmu16           | 96225528        |
| 6834                                                                                             | ENSG00000172186 | 388476       | Hsa18            | 53837019         | ENSMUSG00000040681  | Hmgn1        | Mmu16           | 96225528        |
| 6834                                                                                             | ENSG00000182015 |              | Hsa15            | 60441529         | ENSMUSG00000040681  | Hmgn1        | Mmu16           | 96225528        |
| 6834                                                                                             | ENSG00000197366 |              | Hsa10            | 124643960        | ENSMUSG00000040681  | Hmgn1        | Mmu16           | 96225528        |
| 6834                                                                                             | ENSG00000182765 | 731576       | Hsa18            | 56612821         | ENSMUSG00000040681  | Hmgn1        | Mmu16           | 96225528        |
| 6834                                                                                             | ENSG00000183731 |              | Hsa17            | 38550499         | ENSMUSG00000040681  | Hmgn1        | Mmu16           | 96225528        |
| 8911                                                                                             | ENSG00000145425 | RPS3A        | Hsa4             | 152240204        | ENSMUSG00000028081  | Rps3a        | Mmu3            | 86223873        |
| 8911                                                                                             | ENSG00000187899 |              | Hsa15            | 57847843         | ENSMUSG00000028081  | Rps3a        | Mmu3            | 86223873        |
| 8911                                                                                             | ENSG00000205871 | 648659       | Hsa15            | 41195189         | ENSMUSG00000028081  | Rps3a        | Mmu3            | 86223873        |
| 8911                                                                                             | ENSG00000178429 | XR_017186.1  | Hsa4             | 153691882        | ENSMUSG00000028081  | Rps3a        | Mmu3            | 86223873        |
| 9067                                                                                             | ENSG00000166035 | LIPC         | Hsa15            | 56511467         | ENSMUSG00000032207  | Lipc         | Mmu9            | 70597340        |
| 9080                                                                                             | ENSG00000128845 | CCPG1        | Hsa15            | 53434741         | ENSMUSG00000034563  | Ccpg1        | Mmu9            | 72782710        |
| 9089                                                                                             | ENSG00000137776 | SLTM         | Hsa15            | 56958537         | ENSMUSG00000032212  | Sltm         | Mmu9            | 70342023        |
| 9095                                                                                             | ENSG00000128923 | FAM63B       | Hsa15            | 56850806         | ENSMUSG00000042444  | B230380D07Ri | Mmu9            | 70403733        |

|       |                 |              |       |          |                   |              |      |          |
|-------|-----------------|--------------|-------|----------|-------------------|--------------|------|----------|
| 9113  | ENSG0000069974  | RAB27A       | Hsa15 | 53283094 | ENSMUSG0000032202 | Rab27a       | Mmu9 | 72841997 |
| 9146  | ENSG00000171956 | FOXB1        | Hsa15 | 58084427 | ENSMUSG0000059246 | Foxb1        | Mmu9 | 69556916 |
| 9163  | ENSG00000103569 | AQP9         | Hsa15 | 56217771 | ENSMUSG0000032204 | Aqp9         | Mmu9 | 70909221 |
| 9167  | ENSG00000181827 | RFXDC2       | Hsa15 | 54166958 | ENSMUSG0000037674 | Rfxdc2       | Mmu9 | 72330807 |
| 9174  | ENSG00000140299 | BNIP2        | Hsa15 | 57742356 | ENSMUSG0000011958 | Bnip2        | Mmu9 | 69788665 |
| 9261  | ENSG00000140307 | GTF2A2       | Hsa15 | 57718358 | ENSMUSG0000033543 | Gtf2a2       | Mmu9 | 69811714 |
| 9266  | ENSG0000066943  | PIGB         | Hsa15 | 53398741 | ENSMUSG0000032203 | Pigb         | Mmu9 | 72805613 |
| 9283  | ENSG00000171016 | PYGO1        | Hsa15 | 53625513 | ENSMUSG0000034910 | Pvgo1        | Mmu9 | 72722780 |
| 9298  | ENSG00000129003 | VPS13C       | Hsa15 | 59931884 | ENSMUSG0000035284 | Vps13c       | Mmu9 | 67639576 |
| 9331  | ENSG00000151575 | TEX9         | Hsa15 | 54444936 | ENSMUSG0000032219 | Tex9         | Mmu9 | 72257146 |
| 9364  | ENSG00000157450 | RNF111       | Hsa15 | 57067157 | ENSMUSG0000032217 | Rnf111       | Mmu9 | 70224593 |
| 9368  | ENSG00000138587 | MNS1         | Hsa15 | 54508299 | ENSMUSG0000032221 | Mns1         | Mmu9 | 72237807 |
| 9372  | ENSG00000166450 | PRTG         | Hsa15 | 53699353 | ENSMUSG0000036030 | Prtg         | Mmu9 | 72606024 |
| 9399  | ENSG00000128849 | CGNL1        | Hsa15 | 55455997 | ENSMUSG0000032232 | Cgnl1        | Mmu9 | 71425069 |
| 9524  | ENSG00000140297 | GCNT3        | Hsa15 | 57691415 | ENSMUSG0000032226 | Gcnt3        | Mmu9 | 69832709 |
| 9565  | ENSG00000140262 | TCF12        | Hsa15 | 54998125 | ENSMUSG0000032228 | Tcf12        | Mmu9 | 71644313 |
| 9622  | ENSG00000128918 | ALDH1A2      | Hsa15 | 56032920 | ENSMUSG0000013584 | Aldh1a2      | Mmu9 | 71014382 |
| 9623  | ENSG00000137845 | ADAM10       | Hsa15 | 56675802 | ENSMUSG0000054693 | Adam10       | Mmu9 | 70478203 |
| 9651  | ENSG00000157470 | FAM81A       | Hsa15 | 57517664 | ENSMUSG0000032224 | 6430514L14Ri | Mmu9 | 69889931 |
| 9651  | ENSG00000153347 | FAM81B       | Hsa5  | 94754247 | ENSMUSG0000032224 | 6430514L14Ri | Mmu9 | 69889931 |
| 9734  | ENSG00000178620 | GRINL1B      | Hsa4  | 68586857 | ENSMUSG0000032199 | Grinl1b      | Mmu9 | 71277019 |
| 9734  | ENSG00000137878 | GRINL1A      | Hsa15 | 55671406 | ENSMUSG0000032199 | Grinl1a      | Mmu9 | 71277019 |
| 9793  | ENSG00000128915 | NARG2        | Hsa15 | 58499100 | ENSMUSG0000032235 | Narg2        | Mmu9 | 69197162 |
| 9796  | ENSG00000137871 | SUHW4        | Hsa15 | 54709671 | ENSMUSG0000038535 | Suhw4        | Mmu9 | 72073547 |
| 9853  | ENSG0000069869  | NEDD4        | Hsa15 | 53906423 | ENSMUSG0000032216 | Nedd4        | Mmu9 | 72461124 |
| 9864  | ENSG00000157456 | Ccnb2        | Hsa15 | 57184612 | ENSMUSG0000032218 | Ccnb2        | Mmu9 | 70206853 |
| 9867  | ENSG0000069667  | RORA         | Hsa15 | 58576755 | ENSMUSG0000032238 | Rora         | Mmu9 | 68452971 |
| 9884  | ENSG00000166415 | WDR72        | Hsa15 | 51594673 | ENSMUSG0000044976 | Wdr72        | Mmu9 | 73907488 |
| 9910  | ENSG00000198535 | NP_997205.1  | Hsa15 | 60146506 | ENSMUSG0000055125 | 3300001A09Ri | Mmu9 | 67558602 |
| 9910  | ENSG00000205052 | NP_001007596 | Hsa15 | 60243294 | ENSMUSG0000055125 | 3300001A09Ri | Mmu9 | 67558602 |
| 9925  | ENSG00000157483 | MYO1E        | Hsa15 | 57215461 | ENSMUSG0000032220 | Myo1e        | Mmu9 | 70086076 |
| 9927  | ENSG00000182718 | ANXA2        | Hsa15 | 58426643 | ENSMUSG0000032231 | Anxa2        | Mmu9 | 69252847 |
| 9927  | ENSG00000183059 | ANXA2P2      | Hsa9  | 33614223 | ENSMUSG0000032231 | Anxa2        | Mmu9 | 69252847 |
| 12608 | ENSG00000182625 |              | Hsa15 | 56765902 | ENSMUSG0000038607 | Gng10        | Mmu4 | 59129210 |
| 12776 | ENSG00000137076 | TLN1         | Hsa9  | 35687336 | ENSMUSG0000028465 | Tln1         | Mmu4 | 43552618 |
| 12776 | ENSG00000171914 | TLN2         | Hsa15 | 60726802 | ENSMUSG0000028465 | Tln1         | Mmu4 | 43552618 |
| 13384 | ENSG00000198722 | UNC13B       | Hsa9  | 35151999 | ENSMUSG0000028456 | Unc13b       | Mmu4 | 43108981 |
| 13384 | ENSG00000137766 | UNC13C       | Hsa15 | 52314521 | ENSMUSG0000028456 | Unc13b       | Mmu4 | 43108981 |
| 14799 | ENSG00000166466 | 440280       | Hsa15 | 54085203 | ENSMUSG0000034724 | Cnot6l       | Mmu5 | 96315891 |
| 14799 | ENSG00000138767 | CNOT6L       | Hsa4  | 78857199 | ENSMUSG0000034724 | Cnot6l       | Mmu5 | 96315891 |

| Genomic distribution of the Mouse orthologs of the Human 10-Mb GN surrounding the human ALDH1A3. |                 |              |                  |                  |                   |              |                 |                 |  |
|--------------------------------------------------------------------------------------------------|-----------------|--------------|------------------|------------------|-------------------|--------------|-----------------|-----------------|--|
| Genomic region analyzed: human chromosome 15 (90.000 KB - 100.000 KB)                            |                 |              |                  |                  |                   |              |                 |                 |  |
| Group ID                                                                                         | Query Gene ID   | Query Ext ID | Query Chromosome | Query Start Base | Outq Gene ID      | Outq Ext ID  | Outq Chromosome | Outq Start Base |  |
| 1301                                                                                             | ENSG00000131873 | CHSY1        | Hsa15            | 99533456         | ENSMUSG0000032640 | Chsy1        | Mmu7            | 65988465        |  |
| 1301                                                                                             | ENSG00000198108 | CHSS3_HUMAN  | Hsa5             | 129268422        | ENSMUSG0000032640 | Chsy1        | Mmu7            | 65988465        |  |
| 1318                                                                                             | ENSG00000140450 | ARRDC4       | Hsa15            | 96304947         | ENSMUSG0000042659 | Arrdc4       | Mmu7            | 68612993        |  |
| 1328                                                                                             | ENSG00000183571 | 145814       | Hsa15            | 97328859         | ENSMUSG0000030553 | C330024D12Ri | Mmu7            | 68110123        |  |
| 1377                                                                                             | ENSG00000176463 | SLCO3A1      | Hsa15            | 90197950         | ENSMUSG0000025790 | Slco3a1      | Mmu7            | 74148931        |  |
| 1497                                                                                             | ENSG00000168904 | LRRC28       | Hsa15            | 97609175         | ENSMUSG0000030556 | Lrrc28       | Mmu7            | 67386924        |  |
| 1522                                                                                             | ENSG00000140471 | LINS1        | Hsa15            | 98926957         | ENSMUSG0000053091 | Lins2        | Mmu7            | 66568908        |  |
| 1530                                                                                             | ENSG00000183060 | LYSMD4       | Hsa15            | 98073429         | ENSMUSG0000043831 | Lysmd4       | Mmu7            | 67101558        |  |
| 1546                                                                                             | ENSG00000140557 | ST8SIA2      | Hsa15            | 90738144         | ENSMUSG0000025789 | St8sia2      | Mmu7            | 73812635        |  |
| 1643                                                                                             | ENSG00000103852 | TTC23        | Hsa15            | 97494052         | ENSMUSG0000030555 | Ttc23        | Mmu7            | 67520954        |  |
| 1690                                                                                             | ENSG00000140443 | IGF1R        | Hsa15            | 97010302         | ENSMUSG0000055533 | Igf1r        | Mmu7            | 67826372        |  |
| 1696                                                                                             | ENSG00000173575 | CHD2         | Hsa15            | 91244423         | ENSMUSG0000025788 | Chd2         | Mmu7            | 73325212        |  |
| 1735                                                                                             | ENSG00000182175 | RGMA         | Hsa15            | 91387651         | ENSMUSG0000070509 | Rgma         | Mmu7            | 73249020        |  |
| 1752                                                                                             | ENSG00000184254 | ALDH1A3      | Hsa15            | 99237580         | ENSMUSG0000015134 | Aldh1a3      | Mmu7            | 66269840        |  |
| 1766                                                                                             | ENSG00000154237 | LRRK1        | Hsa15            | 99277073         | ENSMUSG0000015133 | C230002E15Ri | Mmu7            | 66137693        |  |
| 1774                                                                                             | ENSG00000131871 | SELS_HUMAN   | Hsa15            | 99628737         | ENSMUSG0000075701 | H47          | Mmu7            | 65958664        |  |
| 1882                                                                                             | ENSG00000183475 | ASB7         | Hsa15            | 98960337         | ENSMUSG0000030509 | Asb7         | Mmu7            | 66523534        |  |
| 1933                                                                                             | ENSG00000154227 | LASS3        | Hsa15            | 98758124         | ENSMUSG0000030510 | XP_620510.2  | Mmu7            | 66643126        |  |
| 2037                                                                                             | ENSG00000182253 | DMN          | Hsa15            | 97462771         | ENSMUSG0000030554 | Dmn          | Mmu7            | 67606115        |  |
| 2069                                                                                             | ENSG00000185551 | NR2F2        | Hsa15            | 94674950         | ENSMUSG0000030551 | Nr2f2        | Mmu7            | 70226952        |  |
| 2150                                                                                             | ENSG00000131876 | SNRPA1       | Hsa15            | 99639240         | ENSMUSG0000030512 | Snrpa1       | Mmu7            | 65939512        |  |
| 2150                                                                                             | ENSG00000144158 | QNSU36_HUMAN | Hsa2             | 114131955        | ENSMUSG0000030512 | Snrpa1       | Mmu7            | 65939512        |  |
| 2163                                                                                             | ENSG00000140479 | PCSK6        | Hsa15            | 99661657         | ENSMUSG0000030513 | Pcsk6        | Mmu7            | 65741163        |  |
| 2286                                                                                             | ENSG00000140563 | MCTP2        | Hsa15            | 92575955         | ENSMUSG0000032776 | Gm489        | Mmu7            | 71951343        |  |
| 2292                                                                                             | ENSG00000185087 | NP_872368.2  | Hsa15            | 96800383         | ENSMUSG0000074071 | NP_001013833 | Mmu7            | 68174341        |  |
| 2364                                                                                             | ENSG0000068305  | MEF2A        | Hsa15            | 97923712         | ENSMUSG0000030557 | Mef2a        | Mmu7            | 67113818        |  |
| 5328                                                                                             | ENSG00000174132 | TMEM157      | Hsa5             | 99898908         | ENSMUSG0000051185 | 2310044D20Ri | Mmu1            | 97144034        |  |
| 5328                                                                                             | ENSG00000185442 | NP_997329.1  | Hsa15            | 90961685         | ENSMUSG0000051185 | 2310044D20Ri | Mmu1            | 97144034        |  |
| 6834                                                                                             | ENSG00000205581 | HMGN1        | Hsa21            | 39636111         | ENSMUSG0000040681 | Hmgn1        | Mmu16           | 96225528        |  |
| 6834                                                                                             | ENSG00000198875 | 731104       | Hsa2             | 97810143         | ENSMUSG0000040681 | Hmgn1        | Mmu16           | 96225528        |  |
| 6834                                                                                             | ENSG00000157576 | XR_018454.1  | Hsa15            | 91055981         | ENSMUSG0000040681 | Hmgn1        | Mmu16           | 96225528        |  |
| 6834                                                                                             | ENSG00000174558 | 728325       | Hsa11            | 3966963          | ENSMUSG0000040681 | Hmgn1        | Mmu16           | 96225528        |  |
| 6834                                                                                             | ENSG00000184409 | 728776       | HsaX             | 153698568        | ENSMUSG0000040681 | Hmgn1        | Mmu16           | 96225528        |  |
| 6834                                                                                             | ENSG00000172186 | 388476       | Hsa18            | 53837019         | ENSMUSG0000040681 | Hmgn1        | Mmu16           | 96225528        |  |
| 6834                                                                                             | ENSG00000182015 |              | Hsa15            | 60441529         | ENSMUSG0000040681 | Hmgn1        | Mmu16           | 96225528        |  |
| 6834                                                                                             | ENSG00000197366 |              | Hsa10            | 124643960        | ENSMUSG0000040681 | Hmgn1        | Mmu16           | 96225528        |  |
| 6834                                                                                             | ENSG00000182765 | 731576       | Hsa18            | 56612821         | ENSMUSG0000040681 | Hmgn1        | Mmu16           | 96225528        |  |
| 6834                                                                                             | ENSG00000183731 |              | Hsa17            | 38550499         | ENSMUSG0000040681 | Hmgn1        | Mmu16           | 96225528        |  |

| Genomic distribution of the Mouse orthologs of the Human 10-Mb GN related to the human ALDH1A3-ogm. |                 |              |                  |                  |                    |              |                 |                 |
|-----------------------------------------------------------------------------------------------------|-----------------|--------------|------------------|------------------|--------------------|--------------|-----------------|-----------------|
| Genomic regions analyzed: human chromosome 5 (90000 KB - 100000 KB)                                 |                 |              |                  |                  |                    |              |                 |                 |
| Group ID                                                                                            | Query Gene ID   | Query Ext ID | Query Chromosome | Query Start Base | Outq Gene ID       | Outq Ext ID  | Outq Chromosome | Outq Start Base |
| 2641                                                                                                | ENSG00000145721 | LIX1         | Hsa5             | 96453330         | ENSMUSG00000047786 | Lix1         | Mmu17           | 17107511        |
| 2731                                                                                                | ENSG00000113441 | LNPEP        | Hsa5             | 96296924         | ENSMUSG00000023845 | Lnpep        | Mmu17           | 17232341        |
| 2838                                                                                                | ENSG00000058729 | RIOK2        | Hsa5             | 96522327         | ENSMUSG00000023846 | Riok2        | Mmu17           | 17079190        |
| 3047                                                                                                | ENSG00000153922 | CHD1         | Hsa5             | 98218819         | ENSMUSG00000023852 | Chd1         | Mmu17           | 15409664        |
| 3166                                                                                                | ENSG00000174136 | RGMB         | Hsa5             | 98132900         | ENSMUSG00000048027 | Rgmb         | Mmu17           | 15509352        |
| 5328                                                                                                | ENSG00000174132 | TMEM157      | Hsa5             | 99898908         | ENSMUSG00000051185 | 2310044D20Ri | Mmu1            | 97144034        |
| 5328                                                                                                | ENSG00000185442 | NP_997329.1  | Hsa15            | 90961685         | ENSMUSG00000051185 | 2310044D20Ri | Mmu1            | 97144034        |
| 5925                                                                                                | ENSG00000175449 | RFESD        | Hsa5             | 95008239         | ENSMUSG00000043190 | AI256775     | Mmu13           | 76467537        |
| 5972                                                                                                | ENSG00000173221 | GLRX         | Hsa5             | 95175309         | ENSMUSG00000021591 | Glrx         | Mmu13           | 76305916        |
| 5972                                                                                                | ENSG00000118990 |              | Hsa5             | 161110059        | ENSMUSG00000021591 | Glrx         | Mmu13           | 76305916        |
| 6027                                                                                                | ENSG00000113369 | ARRDC3       | Hsa5             | 90700299         | ENSMUSG00000074794 | Arrdc3       | Mmu13           | 81347107        |
| 6033                                                                                                | ENSG00000145757 | SPATA9       | Hsa5             | 95013641         | ENSMUSG00000021590 | Spta9        | Mmu13           | 76433741        |
| 6056                                                                                                | ENSG00000118985 | ELL2         | Hsa5             | 95246558         | ENSMUSG00000001542 | Ell2         | Mmu13           | 76173653        |
| 6064                                                                                                | ENSG00000164307 | ARTS1_HUMAN  | Hsa5             | 96122277         | ENSMUSG00000021583 | Arts1        | Mmu13           | 75105875        |
| 6064                                                                                                | ENSG00000164308 | NP_071745.1  | Hsa5             | 96237474         | ENSMUSG00000021583 | Arts1        | Mmu13           | 75105875        |
| 6074                                                                                                | ENSG00000175426 | PCSK1        | Hsa5             | 95751875         | ENSMUSG00000021587 | Pcsk1        | Mmu13           | 75555989        |
| 6099                                                                                                | ENSG00000198677 | KIAA0372     | Hsa5             | 94825355         | ENSMUSG00000033991 | AK129128     | Mmu13           | 76564804        |
| 6200                                                                                                | ENSG00000178015 | GPR150       | Hsa5             | 94981538         | ENSMUSG00000045509 | Gpr150       | Mmu13           | 76521543        |
| 6218                                                                                                | ENSG00000113391 | C5orf21      | Hsa5             | 92979536         | ENSMUSG00000064138 | 1110033M05Ri | Mmu13           | 78172266        |
| 6218                                                                                                | ENSG00000175841 | 131909       | Hsa3             | 102723845        | ENSMUSG00000064138 | 1110033M05Ri | Mmu13           | 78172266        |
| 6220                                                                                                | ENSG00000153113 | CAST         | Hsa5             | 96023533         | ENSMUSG00000021585 | Cast         | Mmu13           | 75160288        |
| 6226                                                                                                | ENSG00000175471 | MCTP1        | Hsa5             | 94068601         | ENSMUSG00000021596 | Mctp1        | Mmu13           | 77105255        |
| 6291                                                                                                | ENSG00000164292 | RHOBTB3      | Hsa5             | 95092635         | ENSMUSG00000021589 | Rhobtb3      | Mmu13           | 76335549        |
| 6322                                                                                                | ENSG00000164291 | ARSK         | Hsa5             | 94916608         | ENSMUSG00000021592 | Arsk         | Mmu13           | 76526714        |
| 6347                                                                                                | ENSG00000175745 | NR2F1        | Hsa5             | 92944799         | ENSMUSG00000069171 | Nr2f1        | Mmu13           | 78652996        |
| 9651                                                                                                | ENSG00000157470 | FAM81A       | Hsa15            | 57517664         | ENSMUSG00000032224 | 6430514L14Ri | Mmu9            | 69889931        |
| 9651                                                                                                | ENSG00000153347 | FAM81B       | Hsa5             | 94754247         | ENSMUSG00000032224 | 6430514L14Ri | Mmu9            | 69889931        |
| 10801                                                                                               | ENSG00000092010 | PSME1        | Hsa14            | 23661207         | ENSMUSG00000022216 | Psme1        | Mmu14           | 54532646        |
| 10801                                                                                               | ENSG00000100911 | PSME2        | Hsa14            | 23682449         | ENSMUSG00000022216 | Psme1        | Mmu14           | 54532646        |
| 10801                                                                                               | ENSG00000174144 |              | Hsa5             | 97574862         | ENSMUSG00000022216 | Psme1        | Mmu14           | 54532646        |
